# Supplementary material
Source: Springer Nature journal article supplement (https://www.springermedizin.de/resource/supplementary/12943_2007_361_MOESM8_ESM.pdf/9554012)

## Belinostat

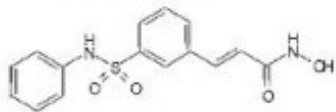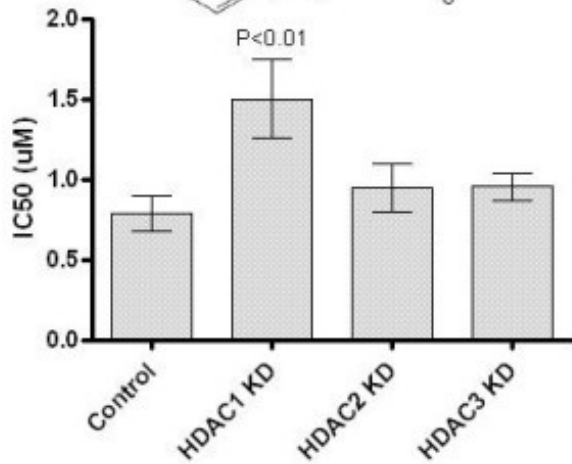

## Valproic Acid

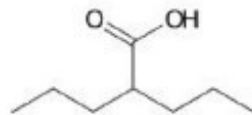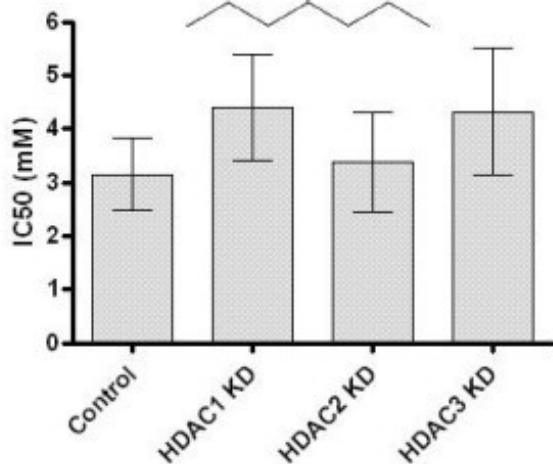

Supplement: MOESM8 [file 9554012]
